# Supplementary material for: Prediction of Tracheal Intubation in Patients with Pierre Robin Sequence: Development of A Machine Learning-Based Model
Source: Research Square preprint supplement (doi:10.21203/rs.3.rs-7570098/v1), 2025-10-20
Supplement: Supplementary file 1 [file 0190b3307e77b405ebec940f.docx]

**Supplementary Materials**

**Supplementary Table 1.** Feature variable selection for logistic regression in the internal derivation cohort

| Variables | OR | 95% CI | *P*-value |
| --- | --- | --- | --- |
| α | 1.15 | 1.12-1.19 | < 0.001 |
| L2 | 1.04 | 1.03 – 1.08 | < 0.001 |
| Traction length of machine disconnection | 1.03 | 1.01 – 1.16 | < 0.001 |
| Palatopharyngeal flow velocity | 0.26 | 0.11 – 0.55 | < 0.001 |
| Mouth opening | 0.84 | 0.71 – 0.98 | 0.031 |


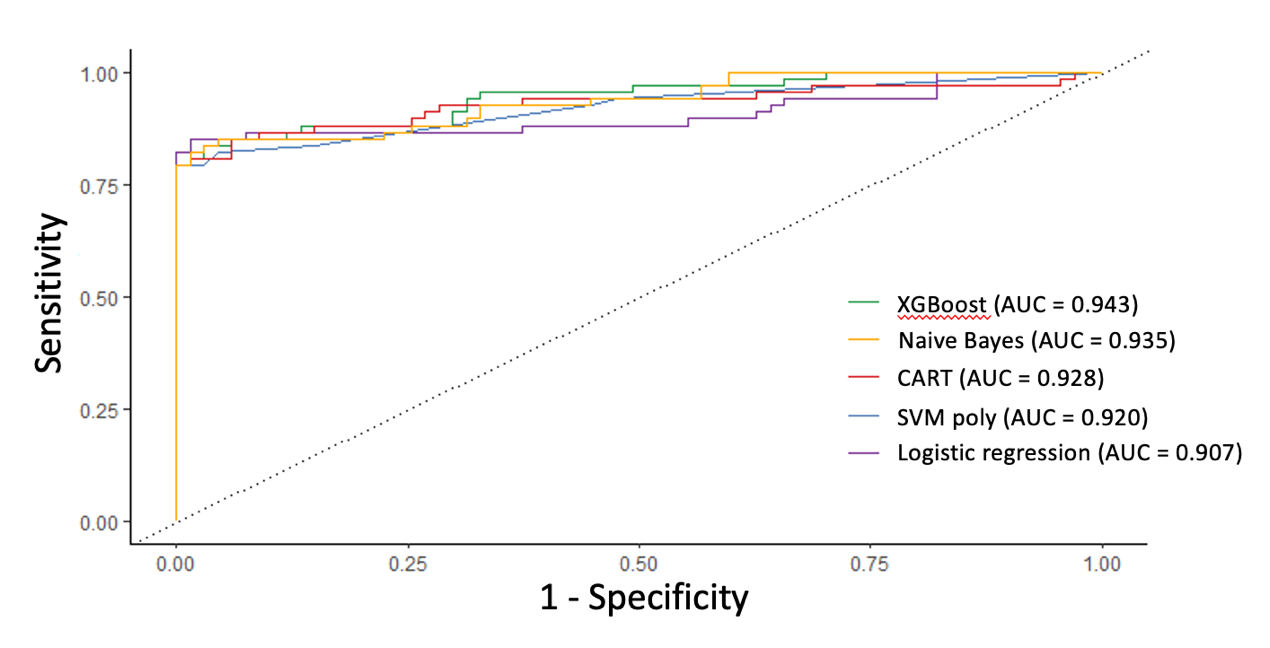


**Supplementary Figure 1.** Model performance evaluation in the external validation cohort. The model performance was evaluated using XGBoost, Naive Bayes, CART, SVM with a polynomial kernel function, and logistic regression classifiers, respectively. XGBoost, extreme gradient boosting; CART, classification and regression tree; SVM, support vector machine.
